# Supplementary material
Source: publisher figshare collection journal article supplement (https://acs.figshare.com/ndownloader/files/10224954)
Supplement: Supplementary file 1 [file 10224954]

64
Coordinates from ORCA-job 3_NiCUC_bpy_opt1
  Ni  5.47744928288586      1.49581996432415      8.35768752367649
  N   5.36007058281867      2.82376636065463      9.76665225071541
  N   5.79495331721722      3.03991974807576      7.22637112541782
  N   4.01564519296263     -0.64633488593134      9.64261060143935
  N   6.64930041552297     -0.40977718596661      6.47985825604261
  N   6.12631208455197     -0.69005072961091     10.15833541705602
  N   4.47987446819972     -0.35190748955665      6.38105523925394
  C   5.10136712696979      2.60194796032407     11.06051678788488
  H   4.93460722415402      1.57857406866039     11.35895962812421
  C   5.56796746389767      4.09244107748659      9.34045332362868
  C   5.53070510369688      5.16272431246288     10.22143218896796
  H   5.70065762120692      6.16843686924410      9.86846215483598
  C   5.26718079540162      4.92752920066760     11.56334960298543
  H   5.23299782903999      5.75260539458434     12.26180769284771
  C   6.27698389805803     -1.38421096541339      5.55568797919037
  C   4.88036290372294     -1.34975823976824      5.49398785448170
  C   4.19603224421801     -1.77512468537428     10.44106160560704
  C   5.81565781747063      4.21470497703166      7.89989524837718
  C   5.55355076748867     -1.80009555461209     10.77563017626326
  C   5.04441823777650      3.62659203543011     11.98986077058631
  H   4.82935219108618      3.39735845510289     13.02333504957527
  C   6.23262920097423      4.20334339814343      5.19084450502913
  H   6.39254775495911      4.15213978520272      4.12356085513576
  C   5.99726470956459      3.03984861426167      5.90354842440134
  H   5.96741863670190      2.08435104782451      5.40322790235111
  C   5.19053117567325     -0.00445130743955      9.47036724703118
  C   3.31588989074904     -2.74729385574767     10.89754938001494
  H   2.26661044111223     -2.73725211577620     10.63850667758206
  C   7.02328564683152     -2.26496701948900      4.78367891861952
  H   8.10342788557189     -2.29115411287764      4.82951234851575
  C   5.55599354109561      0.20300185800609      6.97841513878350
  C   6.25592007265814      5.41042374731815      5.87358191034055
  H   6.43572049617554      6.33861176745036      5.34903016831125
  C   4.91067468263379     -3.08621914089207      3.88844046240251
  H   4.39500780247537     -3.76933191331984      3.22671659350876
  C   6.04373593167431      5.41561338351874      7.24495985938848
  H   6.05639201988885      6.34492194913467      7.79413810152529
  C   4.16749697474104     -2.19987084323469      4.65830016797224
  H   3.08750092427070     -2.18173685041346      4.60713572122151
  C   3.85138068853974     -3.74439171782660     11.70360462084563
  H   3.20186105840725     -4.52372537283370     12.07895050791899
  C   2.72228039047302     -0.19393171817936      9.12854232914040
  H   2.71884169692107      0.89576825989349      9.15910238769975
  H   1.96905296056317     -0.53639544697253      9.83466022531771
  C   5.21260415636882     -3.76596906113765     12.04229321914617
  H   5.58699058976323     -4.56097093132204     12.67339410324562
  C   6.09117949038088     -2.79176387262959     11.58539556687984
  H   7.13974336476361     -2.80920629758090     11.84763294985385
  C   6.31193791519022     -3.11818314216938      3.94901434619783
  H   6.85152413157977     -3.82454509306182      3.33239607349615
  C   3.09118979756972      0.05470074246876      6.59574266651252
  H   2.56736259188047     -0.10926016591262      5.65595957645492
  H   3.08696765586518      1.12917315834472      6.78011972933536
  C   8.02985091747641     -0.08941990346787      6.80851133640328
  H   8.50166681618271     -0.92914683459805      7.31633187174349
  H   8.04481519505479      0.78529437689137      7.45184644437775
  H   8.57936536158399      0.13237428443582      5.89508802031825
  C   7.52507782057595     -0.31289444625052     10.29663685226065
  H   7.78102957563587     -0.24669337005543     11.35245570568263
  H   7.67367595739228      0.65865929042297      9.83618145104188
  H   8.16558701368938     -1.05035338236632      9.81617419573890
  C   2.38166142024422     -0.68654012500302      7.72512810193467
  H   1.31010981470093     -0.52878106268326      7.58636720869773
  H   2.55608226309928     -1.76205224789238      7.64475565066355
